# Supplementary material
Source: PubMed Central journal article supplement (PMC4833465)
Supplement: mmc1.pdf [file mmc1.pdf]

**Supplemental Data**

**Mutations in *TBCK*, Encoding TBC1-Domain-Containing  
Kinase, Lead to a Recognizable Syndrome  
of Intellectual Disability and Hypotonia**

**Elizabeth J. Bhoj, Dong Li, Margaret Harr, Shimon Edvardson, Orly Elpeleg, Elizabeth Chisholm, Jane Juusola, Ganka Douglas, Maria J. Guillen Sacoto, Karine Siquier-Pernet, Abdelkrim Saadi, Christine Bole-Feysot, Patrick Nitschke, Alekhya Narravula, Maria Walke, Michele B. Horner, Debra-Lynn Day-Salvatore, Parul Jayakar, Samantha A. Schrier Vergano, Mark A. Tarnopolsky, Madhuri Hegde, Laurence Colleaux, Peter Crino, and Hakon Hakonarson**

|                                               | Individual 1-1*                                         | Individual 1-2*                                         | Individual 2-1                         | Individual 3-1              | Individual 4-1                                                                       | Individual 4-2                                                                      | Individual 5-1                                                             | Individual 6-1                                                              | Individual 6-2                                                               | Individual 7-1   | Individual 8-1                                                            | Individual 9-1                                                            | Individual 9-2                                                            |
|-----------------------------------------------|---------------------------------------------------------|---------------------------------------------------------|----------------------------------------|-----------------------------|--------------------------------------------------------------------------------------|-------------------------------------------------------------------------------------|----------------------------------------------------------------------------|-----------------------------------------------------------------------------|------------------------------------------------------------------------------|------------------|---------------------------------------------------------------------------|---------------------------------------------------------------------------|---------------------------------------------------------------------------|
| <b>Variants (NM_001163435.2)</b>              | Hom c.1897+1 G>A                                        | Hom c.1897+1 G>A                                        | Hom c.831_83 2insTA;p .Pro278T yrf5*18 | Hom c.1652T >C;p.Le u551Pro | Het [c.2060- 2A>G];[ c.803_80 6delTGA A;p.Met 268fsArg *26]                          | Het [c.2060- 2A>G];[ c.803_80 6delTGA A;p.Met 268fsArg *26]                         | Hom c.376C> T; p.Arg12 6*                                                  | Hom c.1370d elA;p.A sn457T hrfs*15                                          | Hom c.1370d elA;p.A sn457T hrfs*15                                           | Hom c.455+ 4 C>G | Hom c.376C >T; p.Arg1 26*                                                 | Het [c.(658 +1_ 659-1)_ (2059+ 1_2060 -1)del]; [c.376C >T; p.Arg1 26*]    | Het [c.(658 +1_ 659-1)_ (2059+ 1_2060 -1)del]; [c.376C >T; p.Arg1 26*]    |
| <b>Mutation Type</b>                          | Splice Site/Frameshift                                  | Splice Site/Frameshift                                  | Insertion / Frameshift                 | Missense                    | Splice Site/Frameshift and Frameshift                                                | Splice Site/Frameshift and Frameshift                                               | Nonsense                                                                   | Frameshift                                                                  | Frameshift                                                                   | Splice           | Nonsense                                                                  | Nonsense                                                                  | Nonsense                                                                  |
| <b>ExAC Frequencies (Variant 1/Variant 2)</b> | <b>Same Locus:</b> c.1897+1 G>T 1/120206 = 0.000008 319 | <b>Same Locus:</b> c.1897+1 G>T 1/120206 = 0.000008 319 | 0                                      | 0                           | <b>Same Variant:</b> 2/120744 = 0.000016 56 0 homozygotes European Non-Finnish and 0 | <b>Same Variant:</b> 2/120744 =0.0000 1656 0 homozygotes European Non-Finnish and 0 | <b>Same Variant :</b> 3/21032 = 0.00014 26 0 homozygotes Latino, 1 African | <b>Same Locus:</b> p.Asn45 7LysfsTer10: 11/1001 72=0.00 01098 0 homozygotes | <b>Same Locus:</b> p.Asn4 57LysfsTer10: 11/100 172=0. 000109 8 0 homozygotes | 0                | <b>Same Variant:</b> 3/2103 2= 0.0001 426 0 homozygotes Latino, 1 African | <b>Same Variant:</b> 3/2103 2= 0.0001 426 0 homozygotes Latino, 1 African | <b>Same Variant:</b> 3/2103 2= 0.0001 426 0 homozygotes Latino, 1 African |
| Total reads/ Total Sequence                   | 8274877 3                                               | N/A                                                     | 1063025 48                             | 1294530 70                  | 1171818 68                                                                           | 1434651 74                                                                          | <b>120488 546</b>                                                          | 289855 072                                                                  | N/A                                                                          | 553000 00        | 202000 000                                                                | N/A                                                                       | Not available                                                             |

|                     |          |     |           |           |           |           |                  |               |     |          |          |     |               |
|---------------------|----------|-----|-----------|-----------|-----------|-----------|------------------|---------------|-----|----------|----------|-----|---------------|
| Total aligned reads | 71472572 | N/A | 105467940 | 128219154 | 116723990 | 142952449 | <b>120006591</b> | Not available | N/A | 54968200 | 19897000 | N/A | Not available |
| Mean Coverage       | 134X     | N/A | 91X       | 133X      | 125X      | 143X      | 132X             | 98% at >30x   | N/A | 85X      | 202X     | N/A | 56X           |

Table S1 – Variants with ExAC database frequencies, both for the exact variant and, where noted, other variants of the same type at the same locus demonstrating allele frequencies consistent with an autosomal recessive disease, and sequencing metrics of the individuals identified by whole exome sequencing (Hom: Homozygous, Het: Heterozygous) \*These patients previously reported by Alazami et al, 2015
